# Supplementary material for: Genome-wide association study reveals a locus for nasal carriage of Staphylococcus aureus in Danish crossbred pigs
Source: PubMed Central journal article supplement (PMC4662016; doi:10.1186/s12917-015-0599-y), 2015-11-26
Supplement: 12917_2015_599_MOESM1_ESM.pdf [file 12917_2015_599_MOESM1_ESM.pdf]

**TABLE S1** Pig and *spa* type distribution across farms.

Distribution across farms of Danish crossbred pigs included in genome-wide association study. The pigs were classified as non-carriers or persistent carriers of *Staphylococcus aureus*. Also shown is the *spa* type distribution among 37 persistent carriers.

| <b>Farm No.</b> | <b>Non-carriers</b> | <b>Persistent carriers<br/>(numbers <i>spa</i>-typed)</b> | <b>Number of persistent carriers<br/>colonized by one <i>spa</i> type</b> | <b>Number of persistent<br/>carriers colonized by<br/>two <i>spa</i> types</b> | <b>Number of persistent<br/>carriers colonized by<br/>three <i>spa</i> types</b> |
|-----------------|---------------------|-----------------------------------------------------------|---------------------------------------------------------------------------|--------------------------------------------------------------------------------|----------------------------------------------------------------------------------|
| 2               | 5                   | 4 (3)                                                     | 3 (t011)                                                                  | 0                                                                              | 0                                                                                |
| 3               | 0                   | 6 (5)                                                     | 0                                                                         | 5 (t034, t1334, t2462)                                                         | 0                                                                                |
| 4               | 4                   | 0                                                         | NA                                                                        | NA                                                                             | NA                                                                               |
| 5               | 0                   | 5 (5)                                                     | 2 (t034, t1333)                                                           | 3 (t034, t1333)                                                                | 0                                                                                |
| 6               | 5                   | 2 (2)                                                     | 0                                                                         | 2 (t034, t1333)                                                                | 0                                                                                |
| 7               | 10                  | 0                                                         | NA                                                                        | NA                                                                             | NA                                                                               |
| 8               | 12                  | 1 (0)                                                     | NA                                                                        | NA                                                                             | NA                                                                               |
| 10              | 0                   | 12 (12)                                                   | 7 (t034)                                                                  | 5 (t034, t3131)                                                                | 0                                                                                |
| 11              | 0                   | 2 (1)                                                     | 0                                                                         | 0                                                                              | 1 (t011, t1580, t5817)                                                           |
| 12              | 1                   | 7 (6)                                                     | 1 (t2315)                                                                 | 4 (t034, t2315, t5817)                                                         | 1 (t2315, t2370, t5817)                                                          |
| 13              | 16                  | 1 (1)                                                     | 0                                                                         | 1 (t034, t1334)                                                                | 0                                                                                |
| 16              | 5                   | 2 (2)                                                     | 0                                                                         | 2 (t034, t337)                                                                 | 0                                                                                |
| 17              | 2                   | 5 (0)                                                     | NA                                                                        | NA                                                                             | NA                                                                               |
| 18              | 7                   | 6 (0)                                                     | NA                                                                        | NA                                                                             | NA                                                                               |
| 20              | 5                   | 3 (0)                                                     | NA                                                                        | NA                                                                             | NA                                                                               |
| Total           | 65                  | 56 (37)                                                   | 13                                                                        | 22                                                                             | 2                                                                                |

NA, not applicable.
